# Supplementary material for: Pharmacological evaluation of new constituents of “Spice”: synthetic cannabinoids based on indole, indazole, benzimidazole and carbazole scaffolds
Source: PubMed Central journal article supplement (PMC6002460; doi:10.1007/s11419-018-0415-z), 2018-04-26
Supplement: 11419_2018_415_MOESM1_ESM.pdf [file 11419_2018_415_MOESM1_ESM.pdf]

## **Pharmacological evaluation of new constituents of “SPICE” – synthetic cannabinoids based on indole, indazole, benzimidazole and carbazole scaffolds**

Clara T. Schoeder,<sup>1,3</sup> Cornelius Hess,<sup>2</sup> Burkhard Madea,<sup>2</sup> Jens Meiler,<sup>4</sup> Christa E. Müller<sup>1,3</sup>

<sup>1</sup> PharmaCenter Bonn, Pharmaceutical Institute, Pharmaceutical Chemistry I, University of Bonn, An der Immenburg 4, 53121 Bonn, Germany

<sup>2</sup> Institute of Forensic Medicine, Forensic Toxicology, University Hospital of Bonn, Stiftsplatz 12, 53111 Bonn, Germany

<sup>3</sup> Research Training Group 1873, University of Bonn, 53127 Bonn, Germany

<sup>4</sup> Departments of Chemistry and Pharmacology, Vanderbilt University, Stevenson Center, Station B 351822, Nashville, TN 37235, USA

\*Address correspondence to:

Prof. Dr. Christa Müller  
Pharmazeutisches Institut, Pharmazeutische Chemie I  
An der Immenburg 4, D-53121 Bonn, Germany  
Phone: +49-228-73-2301  
Fax: +49-228-73-2567  
E-Mail: [christa.mueller@uni-bonn.de](mailto:christa.mueller@uni-bonn.de)

| <b><u>Content</u></b>                                                                                                                                                                                                                                                                                                                                                                                            | <b><u>Page</u></b> |
|------------------------------------------------------------------------------------------------------------------------------------------------------------------------------------------------------------------------------------------------------------------------------------------------------------------------------------------------------------------------------------------------------------------|--------------------|
| <b>Docking procedure</b>                                                                                                                                                                                                                                                                                                                                                                                         | <b>S3</b>          |
| <b>Figure S1:</b> ligand RMSD versus Score (interface delta)                                                                                                                                                                                                                                                                                                                                                     | <b>S9</b>          |
| <b>Figure S2:</b> Poses obtained from docking. A and C show a pose, where the N-valine methyl ester aligns with the alkyl side chain of the THC-derivative, whereas B and D show poses, in which the p-fluorobenzyl residue aligns with the alkyl side chain of the THC-derivative. A and B are derived from 5xr8 and C and D from 5xra. Green = AM841/AM11542 ( <b>45</b> ), blue = MDMB-FUBINACA ( <b>12</b> ) | <b>S10</b>         |
| <b>Figure S3:</b> Cannabinoid receptor activation by MDMB-CHMCZCA ( <b>41</b> ) determined in cAMP accumulation assays                                                                                                                                                                                                                                                                                           | <b>S11</b>         |
| <b>Figure S4:</b> Receptor activation of the cannabinoid receptor CB <sub>1</sub> ( <b>A-C</b> ) and CB <sub>2</sub> ( <b>D-E</b> ) by MDMB-FUBINACA ( <b>12, A, D</b> ), EG-2201 ( <b>40, B, D</b> ) and MDMD-CHMCZCA ( <b>41, C</b> ). <b>F.</b> Efficacy of tested compounds compared to max. response of CP55,940 ( <b>2</b> )                                                                               | <b>S12</b>         |

## Docking procedure

The docking procedure was carried out with RosettaLigand ([www.RosettaCommons.org](http://www.RosettaCommons.org)) using the 2017.08.59291 build) [1],[2].

The ligand was processed to a Rosetta-friendly format resulting in a library of conformers.

```
NAME LG1
IO_STRING LG1 Z
TYPE LIGAND
AA UNK
ATOM C8 aroC X -0.07
ATOM C5 aroC X -0.07
ATOM C4 aroC X -0.07
ATOM C3 aroC X -0.07
ATOM C2 aroC X -0.07
ATOM C1 aroC X -0.07
ATOM C6 aroC X -0.07
ATOM H4 Haro X 0.16
ATOM H1 Haro X 0.16
ATOM H2 Haro X 0.16
ATOM H3 Haro X 0.16
ATOM N1 Nhis X -0.49
ATOM C7 aroC X -0.07
ATOM H5 Haro X 0.16
ATOM C10 CH2 X -0.14
ATOM C11 aroC X -0.07
ATOM C12 aroC X -0.07
ATOM C13 aroC X -0.07
ATOM C14 aroC X -0.07
ATOM C15 aroC X -0.07
ATOM C16 aroC X -0.07
ATOM H12 Haro X 0.16
ATOM H11 Haro X 0.16
ATOM F1 F X -0.21
ATOM H10 Haro X 0.16
ATOM H9 Haro X 0.16
ATOM H7 Hapo X 0.14
ATOM H8 Hapo X 0.14
ATOM C9 COO X 0.66
ATOM O1 ONH2 X -0.51
ATOM N2 Ntrp X -0.57
ATOM C17 CH1 X -0.05
ATOM C18 COO X 0.66
ATOM O2 OOC X -0.72
ATOM O3 OH X -0.62
ATOM C20 CH3 X -0.23
ATOM H14 Hapo X 0.14
ATOM H15 Hapo X 0.14
ATOM H16 Hapo X 0.14
ATOM C19 CH1 X -0.05
ATOM C21 CH3 X -0.23
ATOM H17 Hapo X 0.14
```

|           |     |      |   |       |
|-----------|-----|------|---|-------|
| ATOM      | H18 | Hapo | X | 0.14  |
| ATOM      | H19 | Hapo | X | 0.14  |
| ATOM      | C22 | CH3  | X | -0.23 |
| ATOM      | H20 | Hapo | X | 0.14  |
| ATOM      | H21 | Hapo | X | 0.14  |
| ATOM      | H22 | Hapo | X | 0.14  |
| ATOM      | C23 | CH3  | X | -0.23 |
| ATOM      | H23 | Hapo | X | 0.14  |
| ATOM      | H24 | Hapo | X | 0.14  |
| ATOM      | H25 | Hapo | X | 0.14  |
| ATOM      | H13 | Hapo | X | 0.14  |
| ATOM      | H6  | Hpol | X | 0.47  |
| BOND_TYPE | C1  | C2   | 2 |       |
| BOND_TYPE | C1  | C6   | 1 |       |
| BOND_TYPE | C1  | H1   | 1 |       |
| BOND_TYPE | C2  | C3   | 1 |       |
| BOND_TYPE | C2  | H2   | 1 |       |
| BOND_TYPE | C3  | C4   | 2 |       |
| BOND_TYPE | C3  | H3   | 1 |       |
| BOND_TYPE | C4  | C5   | 1 |       |
| BOND_TYPE | C4  | N1   | 1 |       |
| BOND_TYPE | C5  | C6   | 2 |       |
| BOND_TYPE | C5  | C8   | 1 |       |
| BOND_TYPE | C6  | H4   | 1 |       |
| BOND_TYPE | N1  | C7   | 1 |       |
| BOND_TYPE | N1  | C10  | 1 |       |
| BOND_TYPE | C7  | C8   | 2 |       |
| BOND_TYPE | C7  | H5   | 1 |       |
| BOND_TYPE | C8  | C9   | 1 |       |
| BOND_TYPE | C9  | O1   | 2 |       |
| BOND_TYPE | C9  | N2   | 1 |       |
| BOND_TYPE | N2  | C17  | 1 |       |
| BOND_TYPE | N2  | H6   | 1 |       |
| BOND_TYPE | C10 | C11  | 1 |       |
| BOND_TYPE | C10 | H7   | 1 |       |
| BOND_TYPE | C10 | H8   | 1 |       |
| BOND_TYPE | C11 | C12  | 1 |       |
| BOND_TYPE | C11 | C16  | 2 |       |
| BOND_TYPE | C12 | C13  | 2 |       |
| BOND_TYPE | C12 | H9   | 1 |       |
| BOND_TYPE | C13 | C14  | 1 |       |
| BOND_TYPE | C13 | H10  | 1 |       |
| BOND_TYPE | C14 | C15  | 2 |       |
| BOND_TYPE | C14 | F1   | 1 |       |
| BOND_TYPE | C15 | C16  | 1 |       |
| BOND_TYPE | C15 | H11  | 1 |       |
| BOND_TYPE | C16 | H12  | 1 |       |
| BOND_TYPE | C17 | C18  | 1 |       |
| BOND_TYPE | C17 | C19  | 1 |       |
| BOND_TYPE | C17 | H13  | 1 |       |
| BOND_TYPE | C18 | O2   | 2 |       |
| BOND_TYPE | C18 | O3   | 1 |       |
| BOND_TYPE | O3  | C20  | 1 |       |
| BOND_TYPE | C19 | C21  | 1 |       |
| BOND_TYPE | C19 | C22  | 1 |       |
| BOND_TYPE | C19 | C23  | 1 |       |
| BOND_TYPE | C20 | H14  | 1 |       |
| BOND_TYPE | C20 | H15  | 1 |       |

```

BOND_TYPE C20 H16 1
BOND_TYPE C21 H17 1
BOND_TYPE C21 H18 1
BOND_TYPE C21 H19 1
BOND_TYPE C22 H20 1
BOND_TYPE C22 H21 1
BOND_TYPE C22 H22 1
BOND_TYPE C23 H23 1
BOND_TYPE C23 H24 1
BOND_TYPE C23 H25 1
CHI 1 C4 N1 C10 C11
CHI 2 C5 C8 C9 O1
CHI 3 C8 C9 N2 C17
CHI 4 C9 N2 C17 C18
CHI 5 N1 C10 C11 C12
CHI 6 N2 C17 C18 O2
CHI 7 N2 C17 C19 C21
CHI 8 C17 C18 O3 C20
NBR_ATOM C8
NBR_RADIUS 9.397383
ICOOR_INTERNAL C8 0.000000 0.000000 0.000000 C8 C5 C4
ICOOR_INTERNAL C5 0.000000 180.000000 1.413739 C8 C5 C4
ICOOR_INTERNAL C4 0.000000 72.939828 1.433449 C5 C8 C4
ICOOR_INTERNAL C3 -178.081945 58.968142 1.411208 C4 C5 C8
ICOOR_INTERNAL C2 -1.302666 61.098747 1.407972 C3 C4 C5
ICOOR_INTERNAL C1 -0.547979 58.997918 1.419139 C2 C3 C4
ICOOR_INTERNAL C6 1.603517 59.964650 1.416310 C1 C2 C3
ICOOR_INTERNAL H4 179.208937 59.887064 1.049956 C6 C1 C2
ICOOR_INTERNAL H1 -179.997458 60.015271 1.049981 C1 C2 C6
ICOOR_INTERNAL H2 179.999934 60.503107 1.049931 C2 C3 C1
ICOOR_INTERNAL H3 -179.997727 59.451276 1.050009 C3 C4 C2
ICOOR_INTERNAL N1 179.168649 73.002410 1.386435 C4 C5 C3
ICOOR_INTERNAL C7 -1.327184 69.939713 1.348030 N1 C4 C5
ICOOR_INTERNAL H5 -178.953852 54.596664 1.049978 C7 N1 C4
ICOOR_INTERNAL C10 -176.418950 57.096615 1.447124 N1 C4 C7
ICOOR_INTERNAL C11 -96.207296 65.840773 1.495939 C10 N1 C4
ICOOR_INTERNAL C12 59.995416 52.094753 1.425596 C11 C10 N1
ICOOR_INTERNAL C13 179.870501 60.942328 1.421018 C12 C11 C10
ICOOR_INTERNAL C14 0.229438 59.880230 1.416734 C13 C12 C11
ICOOR_INTERNAL C15 -1.268820 61.119116 1.421449 C14 C13 C12
ICOOR_INTERNAL C16 1.619328 59.405843 1.397668 C15 C14 C13
ICOOR_INTERNAL H12 179.097267 60.350328 1.050067 C16 C15 C14
ICOOR_INTERNAL H11 179.996678 60.294620 1.050028 C15 C14 C16
ICOOR_INTERNAL F1 -179.992135 59.439727 1.376342 C14 C13 C15
ICOOR_INTERNAL H10 179.998995 60.061642 1.050062 C13 C12 C14
ICOOR_INTERNAL H9 -179.999966 59.535425 1.049992 C12 C11 C13
ICOOR_INTERNAL H7 -120.678958 71.717642 1.070047 C10 N1 C11
ICOOR_INTERNAL H8 -121.665587 73.272279 1.070020 C10 N1 H7
ICOOR_INTERNAL C9 179.523654 53.338482 1.471068 C8 C5 C4
ICOOR_INTERNAL O1 -0.995463 53.335989 1.230533 C9 C8 C5
ICOOR_INTERNAL N2 179.993378 63.330819 1.390685 C9 C8 O1
ICOOR_INTERNAL C17 179.000772 56.770867 1.478336 N2 C9 C8
ICOOR_INTERNAL C18 -116.570422 71.646858 1.480140 C17 N2 C9
ICOOR_INTERNAL O2 -55.994104 54.046965 1.247846 C18 C17 N2
ICOOR_INTERNAL O3 179.993126 62.975686 1.383005 C18 C17 O2
ICOOR_INTERNAL C20 -179.998373 63.636285 1.431835 O3 C18 C17
ICOOR_INTERNAL H14 -79.771489 70.539106 1.069993 C20 O3 C18
ICOOR_INTERNAL H15 119.989753 70.534311 1.070028 C20 O3 H14

```

|                                                                      |     |             |           |          |     |     |     |
|----------------------------------------------------------------------|-----|-------------|-----------|----------|-----|-----|-----|
| ICOOR_INTERNAL                                                       | H16 | 119.999972  | 70.513618 | 1.069984 | C20 | O3  | H15 |
| ICOOR_INTERNAL                                                       | C19 | -126.424534 | 75.699428 | 1.597209 | C17 | N2  | C18 |
| ICOOR_INTERNAL                                                       | C21 | -62.003856  | 64.152627 | 1.552813 | C19 | C17 | N2  |
| ICOOR_INTERNAL                                                       | H17 | -55.816744  | 70.541476 | 1.069909 | C21 | C19 | C17 |
| ICOOR_INTERNAL                                                       | H18 | 119.987088  | 70.534845 | 1.069978 | C21 | C19 | H17 |
| ICOOR_INTERNAL                                                       | H19 | 119.993711  | 70.517646 | 1.070062 | C21 | C19 | H18 |
| ICOOR_INTERNAL                                                       | C22 | 121.476753  | 72.083519 | 1.519903 | C19 | C17 | C21 |
| ICOOR_INTERNAL                                                       | H20 | 171.206836  | 70.500562 | 1.070024 | C22 | C19 | C17 |
| ICOOR_INTERNAL                                                       | H21 | 119.992838  | 70.541686 | 1.069982 | C22 | C19 | H20 |
| ICOOR_INTERNAL                                                       | H22 | 120.018321  | 70.545348 | 1.070027 | C22 | C19 | H21 |
| ICOOR_INTERNAL                                                       | C23 | 118.401404  | 68.277953 | 1.557897 | C19 | C17 | C22 |
| ICOOR_INTERNAL                                                       | H23 | -174.644420 | 70.495385 | 1.070033 | C23 | C19 | C17 |
| ICOOR_INTERNAL                                                       | H24 | 119.990850  | 70.542533 | 1.069993 | C23 | C19 | H23 |
| ICOOR_INTERNAL                                                       | H25 | 120.012181  | 70.540292 | 1.069980 | C23 | C19 | H24 |
| ICOOR_INTERNAL                                                       | H13 | -117.960247 | 63.125624 | 1.069927 | C17 | N2  | C19 |
| ICOOR_INTERNAL                                                       | H6  | -179.995566 | 61.613699 | 1.020022 | N2  | C9  | C17 |
| PDB_ROTAMERS /home/clary/Dokumente/cannabinoid_modeling/LG_confs.pdb |     |             |           |          |     |     |     |

The docking procedure was carried out using the following options and the following docking script.

#### Docking options

```
-database
/home/clary/Dokumente/rosetta/rosetta_bin_linux_2017.08.59291_bundle/main/database/
-in
  -file
    -extra_res_fa LG.params
-packing
  -ex1
  -exlaro
  -ex2
-parser
  -protocol new_dock_MDMB.xml

-out
  -file
    -fullatom
  -pdb

-score
```

## Docking script

```
<ROSETTASCRIPTS>
  <SCOREFXNS>
    <ligand_soft_rep weights=ligand_soft_rep>
      <Reweight scoretype=fa_elec weight=0.42/>
      <Reweight scoretype=hbond_bb_sc weight=1.3/>
      <Reweight scoretype=hbond_sc weight=1.3/>
      <Reweight scoretype=rama weight=0.2/>
    </ligand_soft_rep>
    <hard_rep weights=ligand>
      <Reweight scoretype=fa_intra_rep weight=0.004/>
      <Reweight scoretype=fa_elec weight=0.42/>
      <Reweight scoretype=hbond_bb_sc weight=1.3/>
      <Reweight scoretype=hbond_sc weight=1.3/>
      <Reweight scoretype=rama weight=0.2/>
    </hard_rep>
  </SCOREFXNS>
  <LIGAND_AREAS>
    <docking_sidechain_X chain=X cutoff=6.0 add_nbr_radius=true
all_atom_mode=true minimize_ligand=10/>
      <final_sidechain_X chain=X cutoff=6.0
add_nbr_radius=true all_atom_mode=true/>
      <final_backbone_X chain=X cutoff=7.0
add_nbr_radius=false all_atom_mode=true Calpha_restraints=0.3/>
  </LIGAND_AREAS>

  <INTERFACE_BUILDERS>
    <side_chain_for_docking ligand_areas=docking_sidechain_X/>
    <side_chain_for_final ligand_areas=final_sidechain_X/>
    <backbone ligand_areas=final_backbone_X extension_window=3/>
  </INTERFACE_BUILDERS>
  <MOVEMAP_BUILDERS>
    <docking sc_interface=side_chain_for_docking
minimize_water=true/>
    <final sc_interface=side_chain_for_final
bb_interface=backbone minimize_water=true/>
  </MOVEMAP_BUILDERS>
  <MOVERS>
    <CompoundTranslate name=compound_translate
randomize_order=false allow_overlap=false>
      <Translate chain=X distribution=uniform angstroms=0.5
cycles=50/>
    </CompoundTranslate>
    <Rotate name=rotate_X chain=X distribution=uniform
degrees=45 cycles=500/>
    <SlideTogether name=slide_together chains=X/>
    <HighResDocker name=high_res_docker cycles=6
repack_every_Nth=3 scorefxn=ligand_soft_rep movemap_builder=docking/>
    <FinalMinimizer name=final scorefxn=hard_rep
movemap_builder=final/>
```

```

    <InterfaceScoreCalculator name=add_scores chains=X
scorefxn=hard_rep/>
    <ParsedProtocol name=low_res_dock>
        <Add mover_name=compound_translate/>
        <Add mover_name=rotate_X/>
        <Add mover_name=slide_together/>
    </ParsedProtocol>
    <ParsedProtocol name=high_res_dock>
        <Add mover_name=high_res_docker/>
        <Add mover_name=final/>
    </ParsedProtocol>
    <ddG name=calculateDDG jump=1 per_residue_ddg=1
repack_bound=0 repack_unbound=0 scorefxn=hard_rep/>
</MOVERS>
<PROTOCOLS>
    <Add mover_name=low_res_dock/>
    <Add mover_name=high_res_dock/>
    <Add mover_name=add_scores/>
    <Add mover_name=calculateDDG/>
</PROTOCOLS>
</ROSETTASCRIPTS>

```

#### Docking command

```

/home/clary/Dokumente/rosetta/rosetta_bin_linux_2017.08.59291_bundle/ma
in/source/bin/rosetta_scripts.default @dock_MDMB.options -l liste.ls -
out:prefix MDMB_ -nstruct 4

```

Models were evaluated by calculating their interface\_delta (bound-unbound energy state). This was accomplished by using the InterfaceAnalyzer:

```

/home/clary/Dokumente/rosetta/rosetta_bin_linux_2017.08.59291_bundle/ma
in/source/bin/InterfaceAnalyzer.default @analyze_interface_MDMB.options
-l liste.ls

```

#### InterfaceAnalyzer options:

```

-in:file:extra_res_fa LG.params
-out:file:score_only interface_scores.fasc
-fixedchains A
-tracer_data_print false

```



Models were analyzed regarding their energetic scoring (interface\_delta) and their spacial arrangement using profit [3] for aligning all models and the Biochemical Library (BCL) ([http://www.meilerlab.org/index.php/bclcommons/show/b\\_apps\\_id/1](http://www.meilerlab.org/index.php/bclcommons/show/b_apps_id/1)) for cluster analysis. From different clusters the best scoring models were selected and visually evaluated.

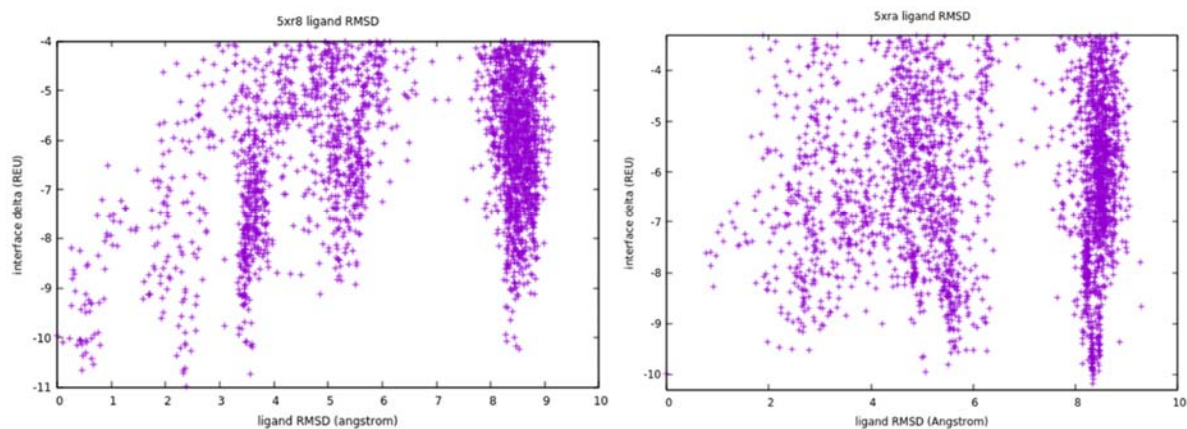

**Figure S1:** ligand RMSD versus Score (interface delta)

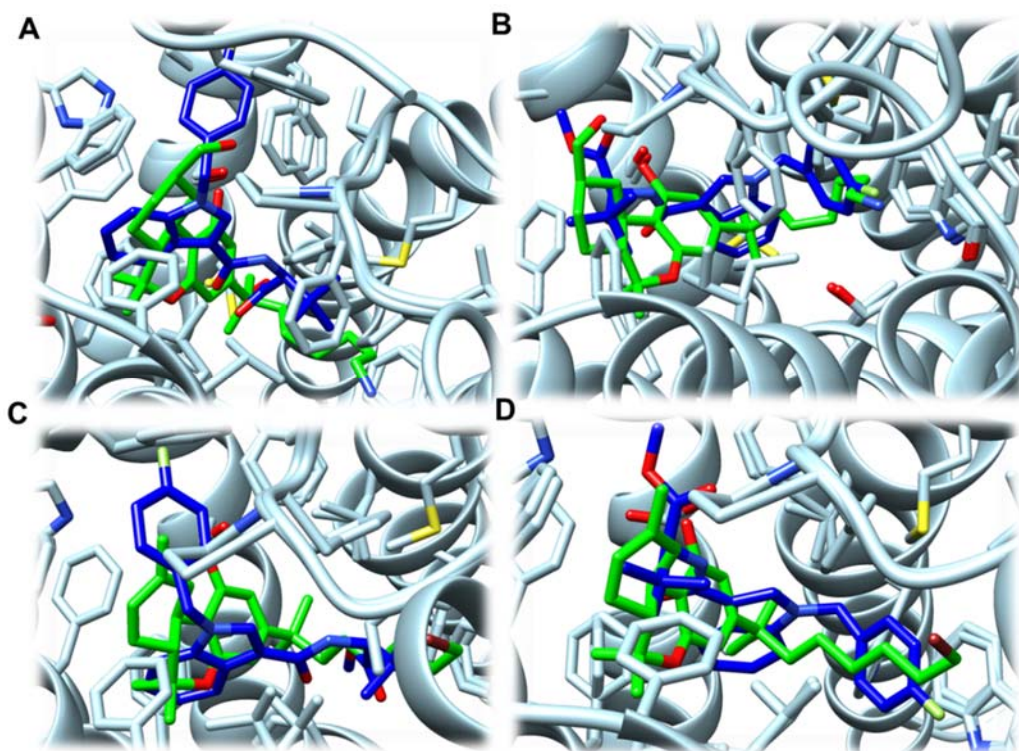

**Figure S2:** Poses obtained from docking. A and C show a pose, where the *N*-valine methyl ester aligns with the alkyl side chain of the THC-derivative, whereas B and D show poses, in which the *p*-fluorobenzyl residue aligns with the alkyl side chain of the THC-derivative. A and B are derived from 5xr8 and C and D from 5xra. Green = AM841/AM11542 (**45**), blue = MDMB-FUBINACA (**12**)

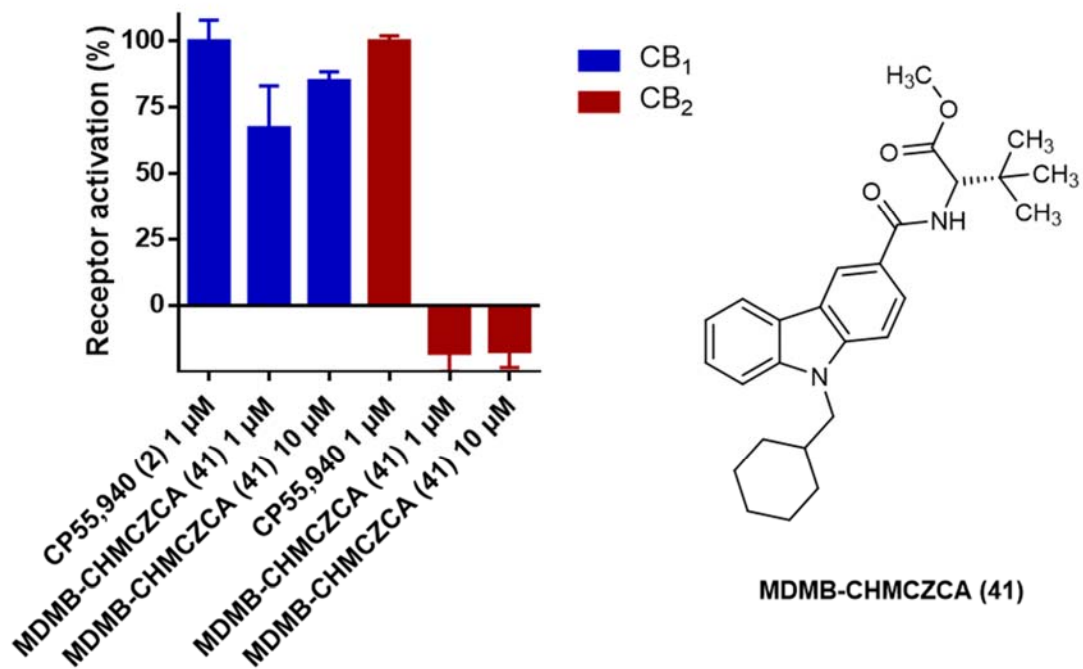

**Figure S3:** Cannabinoid receptor activation by MDMB-CHMCZCA (**41**) determined in cAMP accumulation assays

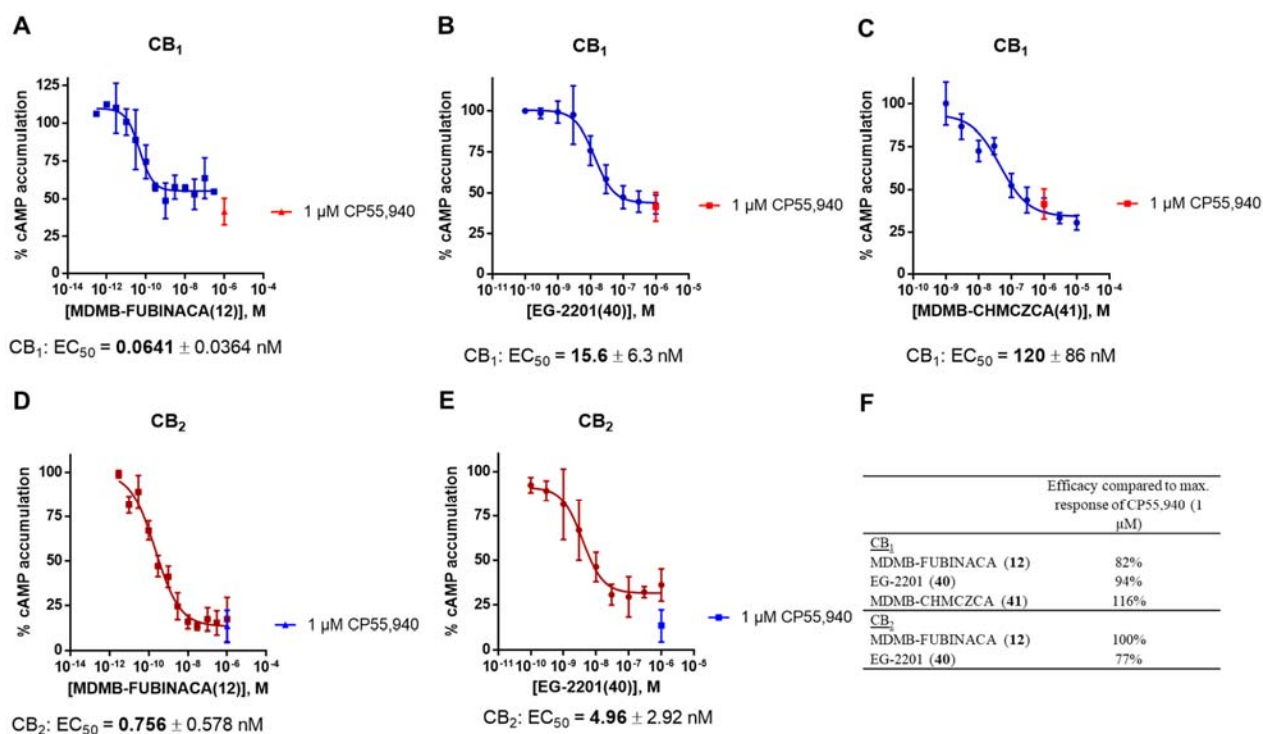

**Figure S4:** Receptor activation of the cannabinoid receptor CB<sub>1</sub> (A-C) and CB<sub>2</sub> (D-E) by MDMB-FUBINACA (12, A, D), EG-2201 (40, B, D) and MDMD-CHMCZCA (41, C). F. Efficacy of tested compounds compared to max. response of CP55,940 (2)

## **References**

- (1) Meiler J, Baker D (2006) ROSETTALIGAND: protein-small molecule docking with full side-chain flexibility. *Proteins* 65: 538–548
- (2) Lemmon G, Meiler J (2012) Rosetta Ligand docking with flexible XML protocols. *Methods Mol Biol* 819: 143–155
- (3) McLachlan AD (1982) Rapid comparison of protein structures. *Acta Crystallographica Section A* 38: 871–873
